2 **Title: Comparing the efficiency of monofilament and traditional nets for capturing bats**

3

4 Authors: Silvia Chaves-Ramírez<sup>1</sup>, Christian Castillo-Salazar<sup>1</sup>, Mariela Sánchez-Chavarría<sup>2</sup>, Hellen  
5 Solís-Hernández<sup>2</sup>, Gloriana Chaverri<sup>2,3\*</sup>

6 ORCID iDs: Christian Castillo-Salazar 0000-0003-0468-983X, Gloriana Chaverri 0000-0002-1155-  
7 432X

8 Affiliations: 1 Escuela de Biología, Universidad de Costa Rica, San Pedro, Costa Rica; 2 Sede del  
9 Sur, Universidad de Costa Rica, Golfito, Costa Rica; 3 Smithsonian Tropical Research Institute,  
10 Balboa, Ancón, Panamá

11

12

13 \*Author for correspondence. E-mail: [gloriana.chaverri@ucr.ac.cr](mailto:gloriana.chaverri@ucr.ac.cr)

14

15

16

17

18 **Abstract**

19 Traditional mist nets used for capturing bats have several drawbacks, particularly that they are  
20 inefficient at sampling many insectivorous species. One possible alternative is to use monofilament  
21 nets, whose netting is made of single strands of yarn instead of several as regular nets, making them  
22 less detectable. To date, no study has quantified the capture efficiency of monofilament nets  
23 compared to regular mist nets for the study of bats. Here we compare capture efficiency of  
24 monofilament and regular mist nets, focusing on bat abundance and species diversity at a lowland  
25 tropical forest in southwestern Costa Rica. During our sampling period, we captured 90 individuals  
26 and 14 species in regular nets and 125 individuals and 20 species in monofilament nets. The use of  
27 monofilament nets increased overall capture rates, but most notably for insectivorous species.  
28 Species accumulation curves indicate that samples based on regular nets are significantly  
29 underestimating species diversity, most notably as these nets fail at sampling rare species. We show  
30 that incorporating monofilament nets into bat studies offers an opportunity to expand records of  
31 different guilds and rare bat species and to improve our understanding of poorly-known bat  
32 assemblages while using a popular, relatively cheap and portable sampling method.

33

34 Key words: bats, Chiroptera, Costa Rica, mist nets.

35

36

## 37 **Introduction**

38 In animal research studies it is often necessary to capture the study organism, and the sample of  
39 individuals that are trapped should ideally be representative of the target species or assemblage.  
40 However, there are many problems associated with trapping methods that hamper the quality of data  
41 obtained, most notably differences in capturing success among individuals or species. A well-known  
42 phenomenon, for example, is the difference in trap-shy or trap-happy species, or those where  
43 individuals consistently avoid traps or those which consistently seek them, respectively, which  
44 creates serious sampling biases [1]. Also, some individuals within a species are easily trapped while  
45 others are not [2], and some sampling methods are consistently more effective than others, even  
46 within the same taxon [3,4]. These biases may significantly affect a study's results and their  
47 interpretation, which thus deteriorates the decisions involving the taxon under study or its habitats.  
48 For example, capture methods may bias estimates of density and population structure [2], population  
49 trends [5], and estimates of species richness and capture rates [6]. It is still possible to account for  
50 capture probabilities as a way to correct for some of these biases [2], yet this requires thorough  
51 knowledge of a trapping method's effect on all target individuals and species [5,7], data which are  
52 commonly not available for the majority of species. Therefore, selecting an appropriate and  
53 representative trapping method is critical for making the correct inferences and appropriate decisions  
54 concerning the focal organism.

55 Bats are the most widely distributed terrestrial mammals on Earth and constitute almost one-  
56 fifth of mammalian biodiversity [8]. However, their ability to fly and nocturnal habits make them a  
57 difficult group to study [9]; thus, efficient sampling methods are essential for their capture and  
58 identification. Despite their large diversity and wide distribution, information on many species is still  
59 deficient, especially in areas that harbor the greatest diversity [10]. A wide variety of methods exists  
60 for the study of bats, which differ in effectiveness and practicality depending on the goal of the

61 study. Among the most commonly known methods for capturing and handling bats are mist nets,  
62 harp traps, hand nets, and direct captures at their roosts [11]. On the other hand, indirect recording of  
63 species has increased with the use of camera traps, thermal cameras and acoustic recording  
64 equipment [12].

65 Bat capture methods, such as mist nets, are considered more invasive as they increase the  
66 stress associated with the capture process and require substantial previous experience, especially  
67 during the process of extracting individuals from the net [13,14]; however, they are essential for  
68 collecting information on morphometrics, acoustics, sensitivity to ectoparasites, species diversity,  
69 and population health, among others. An additional problem with the use of mist nets is that some  
70 species are very difficult to capture, either because they fly extremely high or because their sensory  
71 abilities allow them to detect and therefore avoid the nets [15,16]. Therefore, other trapping methods  
72 have been developed, such as harp traps, which tend to reflect fewer high-frequency echoes  
73 compared to traditional mist nets, making it easier to trap species that use high-frequency calls,  
74 especially those that feed on insects [17–19]. But harp traps also have limitations; for example, their  
75 sampling area is small, making it necessary to increase the number of traps and to have prior  
76 knowledge of flight routes to increase capture efficiency. On the other hand, indirect methods such  
77 as acoustic monitoring may be advantageous since they do not cause stress to the animals and may  
78 be able to record individuals that fly very high and/or are difficult to capture. Acoustic monitoring  
79 studies, however, depend on the availability of sufficiently large and representative acoustic libraries,  
80 which are not yet available for many sites and species [20]. In addition, the use of acoustic recording  
81 equipment imposes higher economic costs than other existing capture methods.

82 Despite the difficulties described above, mist nets remain an essential, practical and  
83 accessible method for capturing bats, facilitating research and monitoring of species worldwide.  
84 Monofilament nets were developed as a novel tool for bat trapping, and these could have great

85 potential to minimize some of the detectability limitations of using mist nets, while still benefiting  
86 from the already well-described advantages of this trapping method. Monofilament nets are designed  
87 to be less detectable by bats, as their netting is made of single strands of yarn, unlike traditional nets  
88 whose netting is created by twisting several individual strands. However, to date no study has  
89 quantified their capture efficiency compared to traditional mist nets. Therefore, the goal of our study  
90 is to quantify the efficiency of monofilament mist nets for capturing bats when compared to  
91 traditional nylon mist nets. Due to the characteristics of monofilament mist nets, we expect that they  
92 will capture i) a greater number of individuals, and ii) a greater diversity of species compared to  
93 traditional mist nets. We also expect to capture iii) a greater number of insectivorous bats in  
94 monofilament nets, given that they are known to effectively detect traditional mist nets.

95

## 96 **Materials and methods**

97 The study was conducted from March 21-28, 2021 at La Cherenga Field Station located at Km 23,  
98 Guaycará district, Golfito, Costa Rica (8.639719 N, 83.074489 W). The station is located at 50 m  
99 above sea level, and its habitat corresponds to a tropical broad-leaved evergreen lowland forest with  
100 average temperatures ranging from 24 to 27°C and annual rainfall of approximately 5000 mm [21].  
101 A large portion of the property is covered by forest in various stages of succession, in addition to an  
102 oil palm (*Elais guineensis*) plantation and grasslands. Our sampling was conducted for 8 nights total  
103 and was alternated between habitat types, such that in total we sampled 4 nights in areas surrounded  
104 by forest (late secondary or primary) and 4 nights in the oil palm plantation.

105 We captured bats in mist nets (Ecotone, Poland) arranged in a block design; this block  
106 included a monofilament net and a regular nylon net (Figure 1) placed next to each other in two  
107 possible configurations, depending on space availability, either in a straight line or in an L shape.  
108 The position of each type of net within the block was randomly selected. The nets ranged in length

109 from 9 to 12 m; we always tried to place similarly-sized nets in the same block, but an exact match  
110 was not always possible given the net sizes available to us. The monofilament nets we used were  
111 made with 0.08 mm single strand nylon, 14 mm mesh size, 4 shelves and were 2.4 m high. The  
112 regular nets were also made with nylon but of multiple strands, and they had a 19 mm mesh size, 5  
113 shelves and were 3 m high. Most nets were placed at ground level, but during the last 4 nights we  
114 placed a single block at approximately 5 m above the ground.

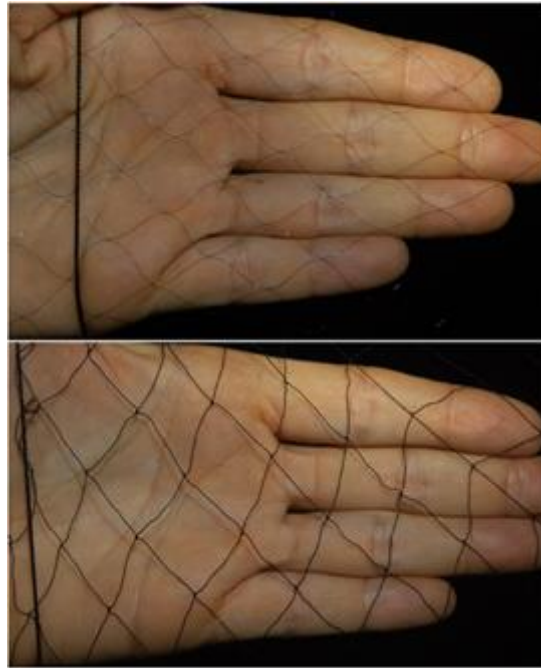

115

116 Figure 1. A monofilament net (upper panel) compared to a regular net (lower panel).

117

118 We opened nets between sunset at 18:00 until 22:00. Each block of 2 nets was monitored by a  
119 single person, and was checked every 2 minutes to determine the presence of bats in them. If any  
120 individual was captured, it was promptly removed from the net to identify the species [22]. For each  
121 individual, the type of net in which it was captured, the species, sex, age and reproductive status  
122 were noted. Once all data were collected, the animal was released. All sampling protocols followed

123 guidelines approved by the American Society of Mammalogists for capture, handling and care of  
124 mammals [23].

125         With the data collected we estimated the number of bats captured per net per night. We  
126 implemented a correction of the capture effort by estimating the number of individuals captured per  
127 square meter per hour, as regular and monofilament nets did not have exactly the same size. We  
128 estimated species diversity based on Hill numbers in the package iNext [24], where  $q = 0$  represents  
129 species richness,  $q = 1$  represents the Shannon diversity index, and  $q = 2$  represents the Simpson  
130 diversity index. Increasing Hill numbers indicate a decreasing emphasis in the contribution of rare  
131 species to estimates of diversity [25]. Finally, we determined the diet for bats sampled based on the  
132 most commonly known food item consumed by each species or genus [26].

133         We used R (R Core Team 2018) and lme4 [28] to perform a linear mixed effects analysis of  
134 the relationship between the number of bats captured and type of net. As fixed effects we entered  
135 type of net and habitat (without interaction term) into the model. As random effects we included  
136 block and night. Visual inspection of residual plots did not reveal any obvious deviations from  
137 homoscedasticity or normality. P-values were obtained by likelihood ratio tests of the full model  
138 with the effect of net type and habitat against the model without the effect of net type, only including  
139 the effect of habitat. We also performed a chi-squared test to determine if there was a significant  
140 difference in the number of regular or monofilament nets that were able to capture insectivorous and  
141 frugivorous bats. Finally, we compared species accumulation curves (interpolated and extrapolated  
142 to double the number of captures for the net that captured the most bats) and sample coverage based  
143 on Hill numbers for both types of nets used.

144

145

146 **Results**

147 We placed a total of 46 nets throughout our 8-night sampling period, 23 regular and 23  
148 monofilament, for a total of 738 and 585.6 m<sup>2</sup> sampled by regular and monofilament nets,  
149 respectively. Both types of nets were opened for 99.5 hours, and in this period, we captured a total of  
150 215 bats from 24 species (table 1); 90 individuals were captured in regular nets while 125 individuals  
151 were sampled using monofilament nets. Fourteen species were captured in regular nets and 20  
152 species in monofilament nets. Also, 10 species were only captured in monofilament nets, such as  
153 several nectar-feeding bats (i.e., *Hylonycteris underwoodi* and *Lonchophylla concava*), several  
154 insectivorous species including many in the genus *Micronycteris* and others such as *Saccopteryx*  
155 *leptura* and *Thyroptera tricolor*. Only 4 species, *Chiroderma villosum*, *Desmodus rotundus*, *Myotis*  
156 *riparius*, and *Trinycteris nicefori*, were solely captured in regular nets. The majority (11 out of 16) of  
157 rare species sampled, i.e., those that were captured in 4 or fewer occasions, are considered  
158 insectivorous (table 1).

159

160

161

162

163

164

165

166



167 Table 1. Number of individuals captured per species in regular and monofilament nets.

| Species                          | Individuals captured |              | Feeding guild  |
|----------------------------------|----------------------|--------------|----------------|
|                                  | Regular              | Monofilament |                |
| <i>Artibeus jamaicensis</i>      | 10                   | 26           | Frugivorous    |
| <i>Artibeus lituratus</i>        | 3                    | 3            | Frugivorous    |
| <i>Carollia castanea</i>         | 8                    | 13           | Frugivorous    |
| <i>Carollia perspicillata</i>    | 27                   | 23           | Frugivorous    |
| <i>Carollia sowelli</i>          | 9                    | 6            | Frugivorous    |
| <i>Chiroderma villosum</i>       | 3                    | 0            | Frugivorous    |
| <i>Dermanura watsoni</i>         | 17                   | 21           | Frugivorous    |
| <i>Desmodus rotundus</i>         | 1                    | 0            | Sanguinivorous |
| <i>Glossophaga soricina</i>      | 1                    | 7            | Nectarivorous  |
| <i>Hylonycteris underwoodi</i>   | 0                    | 1            | Nectarivorous  |
| <i>Lonchophylla concava</i>      | 0                    | 1            | Nectarivorous  |
| <i>Lophostoma brasiliense</i>    | 0                    | 2            | Insectivorous  |
| <i>Micronycteris hirsuta</i>     | 0                    | 2            | Insectivorous  |
| <i>Micronycteris minuta</i>      | 0                    | 1            | Insectivorous  |
| <i>Micronycteris microtis</i>    | 1                    | 2            | Insectivorous  |
| <i>Micronycteris schmidtorum</i> | 0                    | 1            | Insectivorous  |
| <i>Myotis riparius</i>           | 3                    | 0            | Insectivorous  |
| <i>Peropteryx kappleri</i>       | 0                    | 1            | Insectivorous  |
| <i>Platyrrhinus helleri</i>      | 0                    | 4            | Frugivorous    |
| <i>Saccopteryx bilineata</i>     | 1                    | 3            | Insectivorous  |
| <i>Saccopteryx leptura</i>       | 0                    | 2            | Insectivorous  |
| <i>Thyroptera tricolor</i>       | 0                    | 1            | Insectivorous  |
| <i>Trinycteris nicefori</i>      | 1                    | 0            | Insectivorous  |
| <i>Uroderma bilobatum</i>        | 5                    | 5            | Frugivorous    |
| Total                            | 90                   | 125          |                |

168 We found that using monofilament nets affected the number of individuals captured ( $\chi^2(1) =$   
169 6.47,  $p = 0.01$ ), increasing capture rates by about 0.04 bats per  $m^2$  per hour compared to regular nets  
170 (Figure 2). A significantly larger portion of insectivorous species (9 out of 11; table 1) was captured  
171 in monofilament nets compared to those captured in regular nets (4 out of 11;  $\chi^2(1) = 4.70$ ,  $p = 0.03$ ).  
172 Both types of nets were equally efficient at capturing frugivorous species (8 out of 9 species).  
173 Monofilament nets also appeared more efficient at capturing rare species than regular nets; 12 out of  
174 16 rare species were captured in monofilament nets, whereas only 6 out of 16 rare species were  
175 sampled using regular nets ( $\chi^2(1) = 4.57$ ,  $p = 0.03$ ).

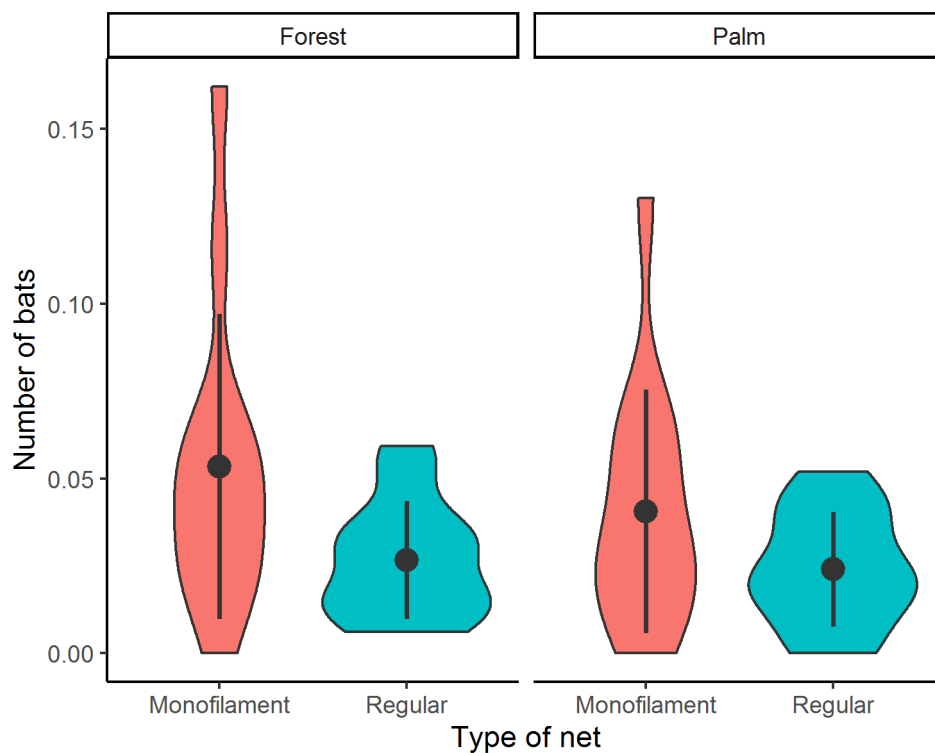

176

177 Figure 2. Violin plots showing the number of bats captured (corrected by sampling effort = bats per  
178  $m^2$  per hour) according to the type of net used and the habitat sampled.

179

180 In regular nets, species richness ( $q = 0$ ) was estimated at 11 (s.e. = 4.45), while species  
181 richness estimated from captures made in monofilament nets was 20 (s.e. = 4.76). Similar differences

182 were observed using other diversity indexes, including Shannon and Simpson ( $q = 1$  & 2,  
183 respectively), although the difference in species diversity between net types decreased with  
184 increasing values in Hill numbers (Figure 3). Species accumulation curves indicate that samples  
185 based on regular nets are significantly underestimating species diversity, even when sample sizes  
186 (i.e., individuals captured) are extrapolated to double the study's sampling effort. Also, the calculated  
187 sample coverage for both nets is equally large, suggesting that an inflated estimate of sample  
188 coverage is created by regular nets even though they seem to be underestimating species diversity  
189 (Figure 3).

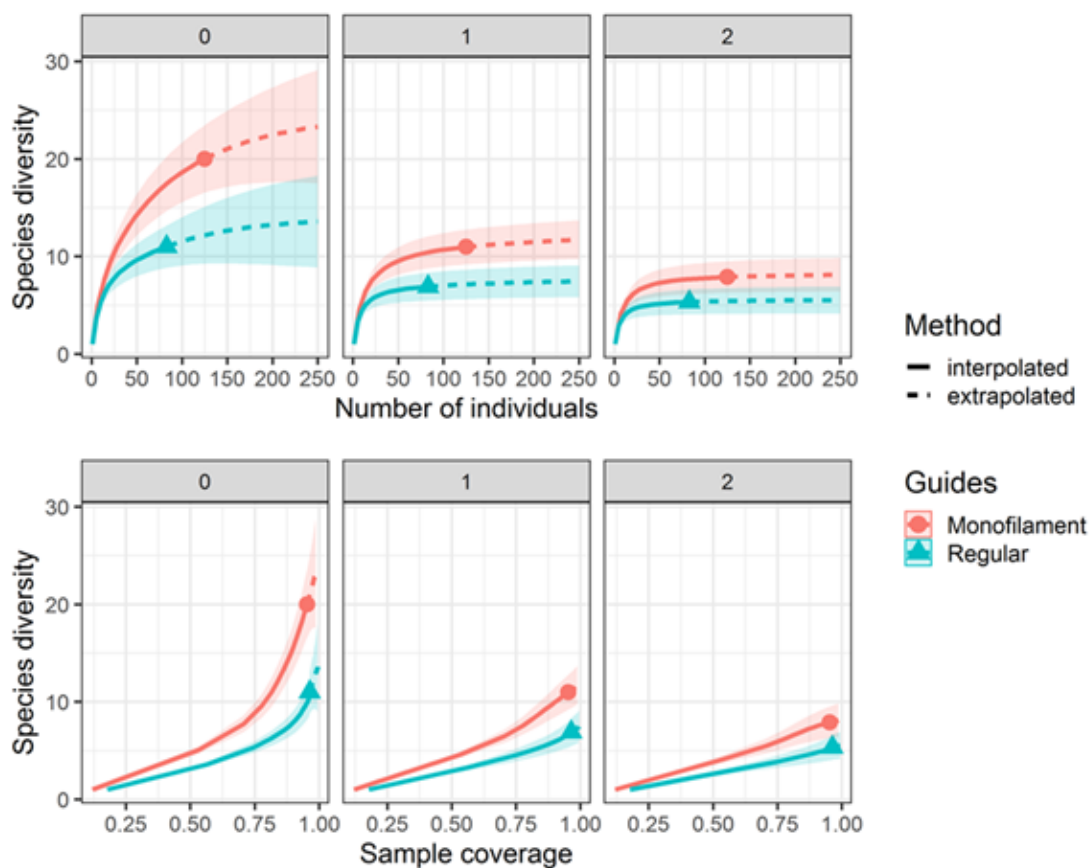

190

191 Figure 3. Species accumulation curves (upper panels) and estimated sample coverage (lower panels)  
192 for the two types of nets used.

193

## 194 **Discussion**

195 In this study we compared bat capture efficiency using regular and monofilament mist nets for  
196 sampling Neotropical bat communities. Our results demonstrate that monofilament nets were able to  
197 capture a larger number of individuals and species compared to regular nets. We found that bats of all  
198 trophic guilds were sampled by monofilament nets, yet these nets were particularly more effective at  
199 sampling insectivorous species compared to regular nets. We also show that monofilament nets were  
200 more likely to capture rare or elusive species and that this difference in capture rates was not affected  
201 by habitat type. Thus, net design, particularly with regards to the number of strands used for  
202 constructing the netting, is an important factor to consider when the main interest of the study is to  
203 gauge species diversity or when certain trophic guilds, especially insectivorous, are targeted in bat  
204 surveys.

205 Conspicuousness of mist nets is considered to be a major factor contributing to lower capture  
206 rates in birds; thus, placing nets in the shade or against a dark background significantly increases their  
207 success [29,30]. While no studies to date have assessed how net placement affects capture rates in  
208 bats, our results of an overall increase in the number of sampled individuals strongly suggest that using  
209 monofilament nets may be an alternative and effective way to decrease their detection by bats. This  
210 decrease in detectability of monofilament nets may also be largely responsible for an increased  
211 probability of capturing insectivorous species, which are known to be skilled at detecting and avoiding  
212 regular mist nets [16]. Since insectivorous bats comprised the majority of rare species sampled in our  
213 study, then it is expected that monofilament nets also captured a larger portion of rare species. With  
214 our data, however, we cannot confirm that these seldom-captured species are in fact locally rare, or if  
215 fewer individuals were captured because they remain skilled at avoiding even the monofilament nets.  
216 Despite the latter, monofilament nets were effective at detecting many rare species, particularly those  
217 in the genus *Micronycteris*, which may be missed in bat surveys that use acoustic detectors in addition  
218 to regular nets, as the former may not be able to record low-intensity calls [31,32].

219 While we found no studies to date that have explicitly compared the efficiency in capture rates  
220 between regular and monofilament nets using a paired design like ours, some previous results indicate  
221 greater capture rates in the latter. For example, a study by Chaverri et al. (2016) shows that capture  
222 rates in regular, polyester, nets were 0.04 bats per net-hour, while capture rates in monofilament nets  
223 were 0.13 bats per net-hour. Other studies in birds suggest that both mesh size, color and the number  
224 of strands that form the netting influence capture rates of nets placed over fish ponds, with  
225 monofilament nets imposing greater risks [34]. The previous results are to be expected, as detectability  
226 of capturing devices clearly affects their effectiveness. However, our results further demonstrate that  
227 the netting material may affect the species that are sampled through mist-nets.

228 It is important to emphasize that before deciding to use monofilament nets in a study, all  
229 researchers involved must be skillful at removing bats from mist nets, as the strands are often hard to  
230 see and they break very easily. Monofilament nets thus require constant revision, since they can be  
231 easily and quickly damaged by bats. Therefore, we recommend checking time intervals between 3 to  
232 5 minutes, which represents a shorter time interval compared to what's recommended for regular mist-  
233 nets (15 min; (Gannon and Sikes 2007; Kunz et al. 2009). Despite this, we consider that reducing net-  
234 checking intervals in general for bat extraction is a practice that should bring significant benefits,  
235 particularly regarding animal safety and net capturing efficiency, as an increase in visits could reduce  
236 data loss due to escape or predation of bats in the net [35]. We are aware that applying these  
237 recommendations may require more field personnel, so researchers should carefully consider the  
238 benefits of using monofilament nets, in the form of a significant increase in capturing efficiency, and  
239 the costs involved in having additional personnel and an inevitable faster deterioration of their mist  
240 nets.

241 In conclusion, we show that incorporating monofilament nets into bat sampling designs offers  
242 not only an opportunity to expand records of different guilds and rare bat species, but ultimately may

243 help to improve our understanding of poorly-known species and assemblages while still using a  
244 relatively cheap and portable method. The use of monofilament nets could help compensate for the  
245 known limitations of regular nets (e.g., inefficient at trapping insectivorous bats) and even harp traps  
246 (e.g., reduced portability and sampling area), providing an additional tool for the study of bat species.  
247 Additional studies are needed to understand the functionality of monofilament nets for other bat  
248 assemblages; meanwhile, we advocate for the use of this simple tool and ideally in combination with  
249 others, including regular mist nets, but also acoustic and roost surveys.

250

251 **Ethics statement.** All protocols for capturing and handling bats comply with the current laws of the  
252 Costa Rican government (permit no. ACOSA-D-R-056-2021).

253

254 **Data accessibility.** All code and raw data have been stored in the GitHub repository  
255 (<https://github.com/morceglo/Monofilament-nets-for-bats>).

256

257 **Author's contributions.** All authors participated in the design of the study, collected field data,  
258 drafted the manuscript. G.C. conducted statistical analyses. All authors gave final approval for  
259 publication.

260

261 **Competing interests.** We have no competing interests.

262

263

## 264 **References**

- 265 1. Biro PA, Dingemanse NJ. 2009 Sampling bias resulting from animal personality. *Trends Ecol.*  
266 *Evol.* **24**, 66–67. (doi:10.1016/j.tree.2008.11.001)
- 267 2. Bisi F, Newey S, Nodari M, Wauters LA, Harrison A, Thirgood S, Martinoli A. 2011 The

- 268 strong and the hungry: bias in capture methods for mountain hares *Lepus timidus*. *Wildlife*  
269 *Biol.* **17**, 311–316. (doi:10.2981/10-133)
- 270 3. Williams DF, Braun SE. 1983 Comparison of Pitfall and Conventional Traps for Sampling  
271 Small Mammal Populations. *J. Wildl. Manage.* **47**, 841. (doi:10.2307/3808622)
- 272 4. Flaquer C, Torre I, Arrizabalaga A. 2007 Comparison of sampling methods for inventory of  
273 bat communities. *J. Mammal.* **88**, 526–533.
- 274 5. Garshelis DL, Noyce K V. 2006 Discerning Biases in a Large Scale Mark-Recapture  
275 Population Estimate for Black Bears. *J. Wildl. Manage.* **70**, 1634–1643.
- 276 6. Kolowski JM, Forrester TD. 2017 Camera trap placement and the potential for bias due to  
277 trails and other features. *PLoS One* **12**, e0186679. (doi:10.1371/journal.pone.0186679)
- 278 7. Baker PJ, Harris S, Robertson CPJ, Saunders G, White PCL. 2001 Differences in the capture  
279 rate of cage-trapped red foxes *Vulpes vulpes* and an evaluation of rabies control measures in  
280 Britain. *J. Appl. Ecol.* **38**, 823–835. (doi:10.1046/j.1365-2664.2001.00637.x)
- 281 8. Burgin CJ, Colella JP, Kahn PL, Upham NS. 2018 How many species of mammals are there?  
282 *J. Mammal.* **99**, 1–14. (doi:10.1093/jmammal/gyx147)
- 283 9. Voigt CC, Kingston T. 2015 *Bats in the anthropocene: Conservation of bats in a changing*  
284 *world*. (doi:10.1007/978-3-319-25220-9)
- 285 10. Frick WF, Kingston T, Flanders J. 2020 A review of the major threats and challenges to global  
286 bat conservation. *Ann. N. Y. Acad. Sci.* **1469**, 5–25. (doi:10.1111/nyas.14045)
- 287 11. Wilson DE, Cole FR, Nichols JD, Rudran R, Foster MS. 1996 *Measuring and monitoring*  
288 *biological diversity: Standard methods for mammals*. Washington, D.C.: Smithsonian Books.  
289 See <http://pubs.er.usgs.gov/publication/5200145>.

- 290 12. Kunz TH, Parsons S. 2009 *Ecological and behavioral methods for the study of bats*.  
291 Baltimore, MD: John Hopkins University Press.
- 292 13. Rizo-Aguilar A, Ávila-Torresagaton LG, Fuentes Vargas L, Lara Nuñez AC, Flores Nuñez  
293 GI, Albino Miranda S. 2015 Técnicas para el estudio de los murciélagos. In *Manual de*  
294 *técnicas del estudio de la fauna* (ed S Gallina Tessaro), Veracruz, México: Instituto de  
295 Ecología, A. C.
- 296 14. Kunz TH, Kurta A. 1988 Capture methods and holding devices. In *Ecological and Behavioral*  
297 *Methods for the Study of Bats* (ed TH Kunz), pp. 1–29. Washington: Smithsonian Institution  
298 Press.
- 299 15. Kalko EK V., Estrada Villegas S, Schmidt M, Wegmann M, Meyer CFJ. 2007 Flying high--  
300 assessing the use of the aerosphere by bats. *Integr. Comp. Biol.* **48**, 60–73.  
301 (doi:10.1093/icb/icn030)
- 302 16. MacSwiney MC, Clarke FM, Racey PA. 2008 What you see is not what you get: The role of  
303 ultrasonic detectors in increasing inventory completeness in Neotropical bat assemblages. *J.*  
304 *Appl. Ecol.* **45**, 1364–1371. (doi:10.1111/j.1365-2664.2008.01531.x)
- 305 17. Pech-Canche JM, Estrella E, López-Castillo DL, Hernández-Betancourt SF, Moreno CE. 2011  
306 Complementarity and efficiency of bat capture methods in a lowland tropical dry forest of  
307 Yucatán, Mexico. *Rev. Mex. Biodivers.* **82**. (doi:10.22201/ib.20078706e.2011.3.683)
- 308 18. Berry N, O’connor W, Holderied MW, Jones G. 2004 Detection and Avoidance of Harp Traps  
309 by Echolocating Bats. *Acta Chiropterologica* **6**, 335–346. (doi:10.3161/001.006.0211)
- 310 19. Duffy AM, Lumsden LF, Caddle CR, Chick RR, Newell GR. 2000 The efficacy of AnaBat  
311 ultrasonic detectors and harp traps for surveying microchiropterans in south-eastern Australia.  
312 *Acta Chiropterologica* **2**, 127–144.



- 313 20. Hayes JP. 2000 Assumptions and practical considerations in the design and interpretation of  
314 echolocation-monitoring studies. *Acta Chiropterologica* **2**, 225–236.
- 315 21. Kappelle M, Castro M, Acevedo H, Gonzalez L, Monge H. 2002 *Ecosistemas del Area de*  
316 *Conservacion Osa (ACOSA)*. Santo Domingo de Heredia, Costa Rica: Instituto Nacional de  
317 Biodiversidad.
- 318 22. York HA, Rodríguez-Herrera B, LaVal RK, Timm RM, Lindsay KE. 2019 Field key to the  
319 bats of Costa Rica and Nicaragua. *J. Mammal.* **100**, 1726–1749.  
320 (doi:10.1093/jmammal/gyz150)
- 321 23. Sikes RS. 2016 2016 Guidelines of the American Society of Mammalogists for the use of wild  
322 mammals in research and education. *J. Mammal.* **97**, 663–688.  
323 (doi:10.1093/jmammal/gyw078)
- 324 24. Hsieh TC, Ma KH, Chao A. 2016 iNEXT: An R package for rarefaction and extrapolation of  
325 species diversity ( Hill numbers ). *Methods Ecol. Evol.* **in press**, 1–22.
- 326 25. Chao A, Gotelli NJ, Hsieh TC, Sander EL, Ma KH, Colwell RK, Ellison AM. 2014  
327 Rarefaction and extrapolation with Hill numbers: A framework for sampling and estimation in  
328 species diversity studies. *Ecol. Monogr.* **84**, 45–67. (doi:10.1890/13-0133.1)
- 329 26. Kalko EKV, Handley CO, Handley D. 1996 Organization, diversity, and long-term dynamics  
330 of a neotropical bat community. In *Long-term Studies in Vertebrate Communities* (eds M  
331 Codyand, J Smallwood), pp. 503–553. Los Angeles, California: Academic Press.
- 332 27. R Core T. 2018 R: A language and Environment for Statistical Computing. *Vienna, Austria*
- 333 28. Bates D, Mächler M, Bolker BM, Walker SC. 2015 Fitting Linear Mixed-Effects Models  
334 Using lme4. *J. Stat. Softw.* **67**, 1–48. (doi:10.18637/jss.v067.i01)
- 335 29. Jenni L, Leuenberger M, Rampazzi F. 1996 Capture Efficiency of Mist Nets with Comments

- 336 on Their Role in the Assessment of Passerine Habitat Use. *J. F. Ornithol.* **67**, 263–274.
- 337 30. Keyes BE, Grue CE. 1982 Capturing birds with mist nets: a review. *North Am. Bird Bander* **7**,
- 338 2–14.
- 339 31. O’Farrell MJ, Gannon WL. 1999 A comparison of acoustic versus capture techniques for the
- 340 inventory of bats. *J. Mammal.* **80**, 24–30.
- 341 32. Portfors C V. *et al.* 2000 Bats from Fazenda Intervaes, Southeastern Brazil: species account
- 342 and comparison between different sampling methods. *Rev. Bras. Zool.* **17**, 533–538.
- 343 (doi:10.1590/S0101-81752000000200022)
- 344 33. Chaverri G, Garin I, Alberdi A, Jimenez L, Castillo-Salazar C, Aihartza J. 2016 Unveiling the
- 345 hidden bat diversity of a neotropical montane forest. *PLoS One* **11**.
- 346 (doi:10.1371/journal.pone.0162712)
- 347 34. Nemptov SC, Olsvig-Whittaker L. 2003 The Use of Netting Over Fishponds as a Hazard to
- 348 Waterbirds. *Waterbirds* **26**, 416–423.
- 349 35. Kunz TH, Hodgkison R, Weise CD. 2009 Methods of capturing and handling bats. In
- 350 *Ecological and Behavioral Methods for the Study of Bats* (eds TH Kunz, S Parsons), pp. 3–35.
- 351 Baltimore, Maryland: The Johns Hopkins University Press.
- 352 36. Gannon WL, Sikes RS. 2007 Guidelines of the American Society of Mammalogists for the
- 353 Use of Wild Mammals in Research. *J. Mammal.* **88**, 809–823. (doi:10.1644/06-MAMM-F-
- 354 185R1.1)

355
